# Supplementary material for: Predicting spin states of iron porphyrins with DFT methods including crystal packing effects and thermodynamic corrections
Source: Royal Society of Chemistry journal article supplement (doi:10.1039/d4cp01327a), 2024-01-01
Supplement: d4cp01327a1.xlsx [file d4cp01327a1.xlsx]

## Sheet: total energies
model	state	geometry	method	basis	energy
[Fe(III)(OEP)(2-MeIm)2](ClO4) (cryst)	doubl		PBE-D3+U(2.00eV)	plain wave	-572.759
[Fe(III)(OEP)(2-MeIm)2](ClO4) (cryst)	quart		PBE-D3+U(2.00eV)	plain wave	-572.77
[Fe(III)(OEP)(2-MeIm)2](ClO4) (cryst)	sext		PBE-D3+U(2.00eV)	plain wave	-572.758
[Fe(III)(OEP)(2-MeIm)2]+	doubl	excised	PBE-D3+U(2.00eV)	plain wave	-491.454
[Fe(III)(OEP)(2-MeIm)2]+	doubl	excised	PBE-D3	def2-TZVP	-3410.12
[Fe(III)(OEP)(2-MeIm)2]+	doubl	optimized	PBE-D3	def2-TZVP	-3410.15
[Fe(III)(OEP)(2-MeIm)2]+	quart	excised	PBE-D3+U(2.00eV)	plain wave	-491.466
[Fe(III)(OEP)(2-MeIm)2]+	quart	excised	PBE-D3	def2-TZVP	-3410.12
[Fe(III)(OEP)(2-MeIm)2]+	quart	optimized	PBE-D3	def2-TZVP	-3410.13
[Fe(III)(OEP)(2-MeIm)2]+	sext	excised	PBE-D3+U(2.00eV)	plain wave	-491.454
[Fe(III)(OEP)(2-MeIm)2]+	sext	excised	PBE-D3	def2-TZVP	-3410.1
[Fe(III)(OEP)(2-MeIm)2]+	sext	optimized	PBE-D3	def2-TZVP	-3410.11
[Fe(III)(TPP)(2-MeIm)2](ClO4).H2O.THF (cryst)	doubl		PBE-D3+U(2.00eV)	plain wave	-2680.98
[Fe(III)(TPP)(2-MeIm)2](ClO4).H2O.THF (cryst)	sext		PBE-D3+U(2.00eV)	plain wave	-2680.92
[Fe(III)(TPP)(2-MeIm)2]+	doubl	excised	PBE-D3+U(2.00eV)	plain wave	-527.724
[Fe(III)(TPP)(2-MeIm)2]+	doubl	excised	PBE-D3	def2-TZVP	-3705.12
[Fe(III)(TPP)(2-MeIm)2]+	doubl	optimized	PBE-D3	def2-TZVP	-3705.13
[Fe(III)(TPP)(2-MeIm)2]+	sext	excised	PBE-D3+U(2.00eV)	plain wave	-527.712
[Fe(III)(TPP)(2-MeIm)2]+	sext	excised	PBE-D3	def2-TZVP	-3705.08
[Fe(III)(TPP)(2-MeIm)2]+	sext	optimized	PBE-D3	def2-TZVP	-3705.09
[Fe(III)(P)(2-MeIm)2]+	doubl	optimized	PBE-D3	def2-TZVP	-2781.72
[Fe(III)(P)(2-MeIm)2]+	doubl	single point	B3LYP-D3	def2-QZVPP/def2-TZVPP	-2783.91
[Fe(III)(P)(2-MeIm)2]+	doubl	single point	B3LYP*-D3	def2-QZVPP/def2-TZVPP	-2782.77
[Fe(III)(P)(2-MeIm)2]+	doubl	single point	TPSSh-D3	def2-QZVPP/def2-TZVPP	-2783.98
[Fe(III)(P)(2-MeIm)2]+	doubl	single point	M06L-D3	def2-QZVPP/def2-TZVPP	-2783.51
[Fe(III)(P)(2-MeIm)2]+	doubl	single point	B2PLYP-D3	def2-QZVPP/def2-TZVPP	-2782.38
[Fe(III)(P)(2-MeIm)2]+	doubl	single point	DSD-PBEB95-D3	def2-QZVPP/def2-TZVPP	-2780.8
[Fe(III)(P)(2-MeIm)2]+	doubl	single point	B3LYP-D3	cc-pVTZ-DK	-2793.44
[Fe(III)(P)(2-MeIm)2]+	doubl	single point	B3LYP-D3	cc-pVTZ	-2783.86
[Fe(III)(P)(2-MeIm)2]+	quart	optimized	PBE-D3	def2-TZVP	-2781.7
[Fe(III)(P)(2-MeIm)2]+	quart	single point	B3LYP-D3	def2-QZVPP/def2-TZVPP	-2783.91
[Fe(III)(P)(2-MeIm)2]+	quart	single point	B3LYP*-D3	def2-QZVPP/def2-TZVPP	-2782.77
[Fe(III)(P)(2-MeIm)2]+	quart	single point	TPSSh-D3	def2-QZVPP/def2-TZVPP	-2783.97
[Fe(III)(P)(2-MeIm)2]+	quart	single point	M06L-D3	def2-QZVPP/def2-TZVPP	-2783.5
[Fe(III)(P)(2-MeIm)2]+	quart	single point	B2PLYP-D3	def2-QZVPP/def2-TZVPP	-2782.37
[Fe(III)(P)(2-MeIm)2]+	quart	single point	DSD-PBEB95-D3	def2-QZVPP/def2-TZVPP	-2780.79
[Fe(III)(P)(2-MeIm)2]+	quart	single point	B3LYP-D3	cc-pVTZ-DK	-2793.44
[Fe(III)(P)(2-MeIm)2]+	quart	single point	B3LYP-D3	cc-pVTZ	-2783.86
[Fe(III)(P)(2-MeIm)2]+	sext	optimized	PBE-D3	def2-TZVP	-2781.68
[Fe(III)(P)(2-MeIm)2]+	sext	single point	B3LYP-D3	def2-QZVPP/def2-TZVPP	-2783.9
[Fe(III)(P)(2-MeIm)2]+	sext	single point	B3LYP*-D3	def2-QZVPP/def2-TZVPP	-2782.76
[Fe(III)(P)(2-MeIm)2]+	sext	single point	TPSSh-D3	def2-QZVPP/def2-TZVPP	-2783.95
[Fe(III)(P)(2-MeIm)2]+	sext	single point	M06L-D3	def2-QZVPP/def2-TZVPP	-2783.51
[Fe(III)(P)(2-MeIm)2]+	sext	single point	B2PLYP-D3	def2-QZVPP/def2-TZVPP	-2782.37
[Fe(III)(P)(2-MeIm)2]+	sext	single point	DSD-PBEB95-D3	def2-QZVPP/def2-TZVPP	-2780.79
[Fe(III)(P)(2-MeIm)2]+	sext	single point	B3LYP-D3	cc-pVTZ-DK	-2793.43
[Fe(III)(P)(2-MeIm)2]+	sext	single point	B3LYP-D3	cc-pVTZ	-2783.85
[Fe(III)(OEP)(2-MeIm)](ClO4).CH2Br2 (cryst)	quart		PBE-D3+U(2.00eV)	plain wave	-2319.46
[Fe(III)(OEP)(2-MeIm)](ClO4).CH2Br2 (cryst)	sext		PBE-D3+U(2.00eV)	plain wave	-2319.41
[Fe(III)(OEP)(2-MeIm)]+	quart	excised	PBE-D3+U(2.00eV)	plain wave	-444.786
[Fe(III)(OEP)(2-MeIm)]+	quart	excised	PBE-D3	def2-TZVP	-3144.77
[Fe(III)(OEP)(2-MeIm)]+	quart	optimized	PBE-D3	def2-TZVP	-3144.78
[Fe(III)(OEP)(2-MeIm)]+	sext	excised	PBE-D3+U(2.00eV)	plain wave	-444.774
[Fe(III)(OEP)(2-MeIm)]+	sext	excised	PBE-D3	def2-TZVP	-3144.75
[Fe(III)(OEP)(2-MeIm)]+	sext	optimized	PBE-D3	def2-TZVP	-3144.75
[Fe(III)(OETPP)(2-MeIm)](ClO4) (cryst)	quart		PBE-D3+U(2.00eV)	plain wave	-1346.58
[Fe(III)(OETPP)(2-MeIm)](ClO4) (cryst)	sext		PBE-D3+U(2.00eV)	plain wave	-1346.55
[Fe(III)(OETPP)(2-MeIm)]+	quart	excised	PBE-D3+U(2.00eV)	plain wave	-591.991
[Fe(III)(OETPP)(2-MeIm)]+	quart	excised	PBE-D3	def2-TZVP	-4068.14
[Fe(III)(OETPP)(2-MeIm)]+	quart	optimized	PBE-D3	def2-TZVP	-4068.15
[Fe(III)(OETPP)(2-MeIm)]+	sext	excised	PBE-D3+U(2.00eV)	plain wave	-591.972
[Fe(III)(OETPP)(2-MeIm)]+	sext	excised	PBE-D3	def2-TZVP	-4068.11
[Fe(III)(OETPP)(2-MeIm)]+	sext	optimized	PBE-D3	def2-TZVP	-4068.12
[Fe(III)(P)(2-MeIm)]+	quart	optimized	PBE-D3	def2-TZVP	-2516.35
[Fe(III)(P)(2-MeIm)]+	quart	single point	B3LYP-D3	def2-QZVPP/def2-TZVPP	-2518.21
[Fe(III)(P)(2-MeIm)]+	quart	single point	B3LYP*-D3	def2-QZVPP/def2-TZVPP	-2517.24
[Fe(III)(P)(2-MeIm)]+	quart	single point	TPSSh-D3	def2-QZVPP/def2-TZVPP	-2518.26
[Fe(III)(P)(2-MeIm)]+	quart	single point	M06L-D3	def2-QZVPP/def2-TZVPP	-2517.86
[Fe(III)(P)(2-MeIm)]+	quart	single point	B2PLYP-D3	def2-QZVPP/def2-TZVPP	-2516.91
[Fe(III)(P)(2-MeIm)]+	quart	single point	DSD-PBEB95-D3	def2-QZVPP/def2-TZVPP	-2515.56
[Fe(III)(P)(2-MeIm)]+	quart	single point	B3LYP-D3	cc-pVTZ-DK	-2527.63
[Fe(III)(P)(2-MeIm)]+	quart	single point	B3LYP-D3	cc-pVTZ	-2518.17
[Fe(III)(P)(2-MeIm)]+	sext	optimized	PBE-D3	def2-TZVP	-2516.32
[Fe(III)(P)(2-MeIm)]+	sext	single point	B3LYP-D3	def2-QZVPP/def2-TZVPP	-2518.2
[Fe(III)(P)(2-MeIm)]+	sext	single point	B3LYP*-D3	def2-QZVPP/def2-TZVPP	-2517.22
[Fe(III)(P)(2-MeIm)]+	sext	single point	TPSSh-D3	def2-QZVPP/def2-TZVPP	-2518.24
[Fe(III)(P)(2-MeIm)]+	sext	single point	M06L-D3	def2-QZVPP/def2-TZVPP	-2517.87
[Fe(III)(P)(2-MeIm)]+	sext	single point	B2PLYP-D3	def2-QZVPP/def2-TZVPP	-2516.9
[Fe(III)(P)(2-MeIm)]+	sext	single point	DSD-PBEB95-D3	def2-QZVPP/def2-TZVPP	-2515.56
[Fe(III)(P)(2-MeIm)]+	sext	single point	B3LYP-D3	cc-pVTZ-DK	-2527.62
[Fe(III)(P)(2-MeIm)]+	sext	single point	B3LYP-D3	cc-pVTZ	-2518.16
[Fe(II)(TPP)(THF)2] (cryst)	singl		PBE-D3+U(2.65eV)	plain wave	-522.338
[Fe(II)(TPP)(THF)2] (cryst)	tripl		PBE-D3+U(2.65eV)	plain wave	-522.354
[Fe(II)(TPP)(THF)2] (cryst)	quint		PBE-D3+U(2.65eV)	plain wave	-522.353
[Fe(II)(TPP)(THF)2]	singl	excised	PBE-D3+U(2.65eV)	plain wave	-522.233
[Fe(II)(TPP)(THF)2]	singl	excised	PBE-D3	def2-TZVP	-3639.11
[Fe(II)(TPP)(THF)2]	singl	optimized	PBE-D3	def2-TZVP	-3639.12
[Fe(II)(TPP)(THF)2]	tripl	excised	PBE-D3+U(2.65eV)	plain wave	-522.246
[Fe(II)(TPP)(THF)2]	tripl	excised	PBE-D3	def2-TZVP	-3639.12
[Fe(II)(TPP)(THF)2]	tripl	optimized	PBE-D3	def2-TZVP	-3639.13
[Fe(II)(TPP)(THF)2]	quint	excised	PBE-D3+U(2.65eV)	plain wave	-522.248
[Fe(II)(TPP)(THF)2]	quint	excised	PBE-D3	def2-TZVP	-3639.1
[Fe(II)(TPP)(THF)2]	quint	optimized	PBE-D3	def2-TZVP	-3639.11
[Fe(II)(P)(THF)2]	singl	optimized	PBE-D3	def2-TZVP	-2715.72
[Fe(II)(P)(THF)2]	singl	single point	B3LYP-D3	def2-QZVPP/def2-TZVPP	-2717.87
[Fe(II)(P)(THF)2]	singl	single point	B3LYP*-D3	def2-QZVPP/def2-TZVPP	-2716.77
[Fe(II)(P)(THF)2]	singl	single point	TPSSh-D3	def2-QZVPP/def2-TZVPP	-2717.92
[Fe(II)(P)(THF)2]	singl	single point	M06L-D3	def2-QZVPP/def2-TZVPP	-2717.47
[Fe(II)(P)(THF)2]	singl	single point	B2PLYP-D3	def2-QZVPP/def2-TZVPP	-2716.37
[Fe(II)(P)(THF)2]	singl	single point	DSD-PBEB95-D3	def2-QZVPP/def2-TZVPP	-2714.86
[Fe(II)(P)(THF)2]	singl	single point	B3LYP-D3	cc-pVTZ-DK	-2727.39
[Fe(II)(P)(THF)2]	singl	single point	B3LYP-D3	cc-pVTZ	-2717.83
[Fe(II)(P)(THF)2]	tripl	optimized	PBE-D3	def2-TZVP	-2715.73
[Fe(II)(P)(THF)2]	tripl	single point	B3LYP-D3	def2-QZVPP/def2-TZVPP	-2717.88
[Fe(II)(P)(THF)2]	tripl	single point	B3LYP*-D3	def2-QZVPP/def2-TZVPP	-2716.78
[Fe(II)(P)(THF)2]	tripl	single point	TPSSh-D3	def2-QZVPP/def2-TZVPP	-2717.93
[Fe(II)(P)(THF)2]	tripl	single point	M06L-D3	def2-QZVPP/def2-TZVPP	-2717.47
[Fe(II)(P)(THF)2]	tripl	single point	B2PLYP-D3	def2-QZVPP/def2-TZVPP	-2716.38
[Fe(II)(P)(THF)2]	tripl	single point	DSD-PBEB95-D3	def2-QZVPP/def2-TZVPP	-2714.87
[Fe(II)(P)(THF)2]	tripl	single point	B3LYP-D3	cc-pVTZ-DK	-2727.4
[Fe(II)(P)(THF)2]	tripl	single point	B3LYP-D3	cc-pVTZ	-2717.84
[Fe(II)(P)(THF)2]	quint	optimized	PBE-D3	def2-TZVP	-2715.71
[Fe(II)(P)(THF)2]	quint	single point	B3LYP-D3	def2-QZVPP/def2-TZVPP	-2717.88
[Fe(II)(P)(THF)2]	quint	single point	B3LYP*-D3	def2-QZVPP/def2-TZVPP	-2716.77
[Fe(II)(P)(THF)2]	quint	single point	TPSSh-D3	def2-QZVPP/def2-TZVPP	-2717.92
[Fe(II)(P)(THF)2]	quint	single point	M06L-D3	def2-QZVPP/def2-TZVPP	-2717.48
[Fe(II)(P)(THF)2]	quint	single point	B2PLYP-D3	def2-QZVPP/def2-TZVPP	-2716.39
[Fe(II)(P)(THF)2]	quint	single point	DSD-PBEB95-D3	def2-QZVPP/def2-TZVPP	-2714.88
[Fe(II)(P)(THF)2]	quint	single point	B3LYP-D3	cc-pVTZ-DK	-2727.39
[Fe(II)(P)(THF)2]	quint	single point	B3LYP-D3	cc-pVTZ	-2717.83
[Fe(II)(TPP)] (cryst)	tripl		B3LYP	pob-T	-6350.76
[Fe(II)(TPP)] (cryst)	quint		B3LYP	pob-T	-6350.73
[Fe(II)(TPP)]	tripl	excised	B3LYP	pob-T	-3175.29
[Fe(II)(TPP)]	tripl	excised	PBE-D3	def2-TZVP	-3174.57
[Fe(II)(TPP)]	tripl	optimized	PBE-D3	def2-TZVP	-3174.59
[Fe(II)(TPP)]	quint	excised	B3LYP	pob-T	-3175.28
[Fe(II)(TPP)]	quint	excised	PBE-D3	def2-TZVP	-3174.54
[Fe(II)(TPP)]	quint	optimized	PBE-D3	def2-TZVP	-3174.56
[Fe(II)(P)]	tripl	optimized	PBE-D3	def2-TZVP	-2251.19
[Fe(II)(P)]	tripl	single point	B3LYP-D3	def2-QZVPP/def2-TZVPP	-2252.71
[Fe(II)(P)]	tripl	single point	B3LYP*-D3	def2-QZVPP/def2-TZVPP	-2251.92
[Fe(II)(P)]	tripl	single point	TPSSh-D3	def2-QZVPP/def2-TZVPP	-2252.75
[Fe(II)(P)]	tripl	single point	M06L-D3	def2-QZVPP/def2-TZVPP	-2252.41
[Fe(II)(P)]	tripl	single point	B2PLYP-D3	def2-QZVPP/def2-TZVPP	-2251.65
[Fe(II)(P)]	tripl	single point	DSD-PBEB95-D3	def2-QZVPP/def2-TZVPP	-2250.54
[Fe(II)(P)]	tripl	single point	B3LYP-D3	cc-pVTZ-DK	-2262.02
[Fe(II)(P)]	tripl	single point	B3LYP-D3	cc-pVTZ	-2252.68
[Fe(II)(P)]	quint	optimized	PBE-D3	def2-TZVP	-2251.16
[Fe(II)(P)]	quint	single point	B3LYP-D3	def2-QZVPP/def2-TZVPP	-2252.7
[Fe(II)(P)]	quint	single point	B3LYP*-D3	def2-QZVPP/def2-TZVPP	-2251.9
[Fe(II)(P)]	quint	single point	TPSSh-D3	def2-QZVPP/def2-TZVPP	-2252.73
[Fe(II)(P)]	quint	single point	M06L-D3	def2-QZVPP/def2-TZVPP	-2252.41
[Fe(II)(P)]	quint	single point	B2PLYP-D3	def2-QZVPP/def2-TZVPP	-2251.64
[Fe(II)(P)]	quint	single point	DSD-PBEB95-D3	def2-QZVPP/def2-TZVPP	-2250.54
[Fe(II)(P)]	quint	single point	B3LYP-D3	cc-pVTZ-DK	-2262.01
[Fe(II)(P)]	quint	single point	B3LYP-D3	cc-pVTZ	-2252.67
